# Supplementary material
Source: publisher figshare collection journal article supplement (https://acs.figshare.com/ndownloader/files/4850992)
Supplement: Supplementary file 1 [file 4850992]

# Adsorption and Unfolding of Lysozyme at a Polarized Aqueous-Organic Liquid Interface

## *Supporting Information*

Mahreen Arooj,<sup>1</sup> Neha S. Gandhi,<sup>1</sup> Cara A. Kreck,<sup>1</sup> Damien W.M. Arrigan<sup>2</sup> and Ricardo L. Mancera<sup>1\*</sup>

<sup>1</sup>*School of Biomedical Sciences, CHIRI Biosciences and Curtin Institute for Computation, and*  
<sup>2</sup>*Department of Chemistry and Nanochemistry Research Institute, Curtin University, GPO Box*  
*U1987, Perth WA 6845, Australia.*

\* Author for correspondence: [R.Mancera@curtin.edu.au](mailto:R.Mancera@curtin.edu.au)  
Tel. +618 9266 1017

Fax. +618 9266 2342

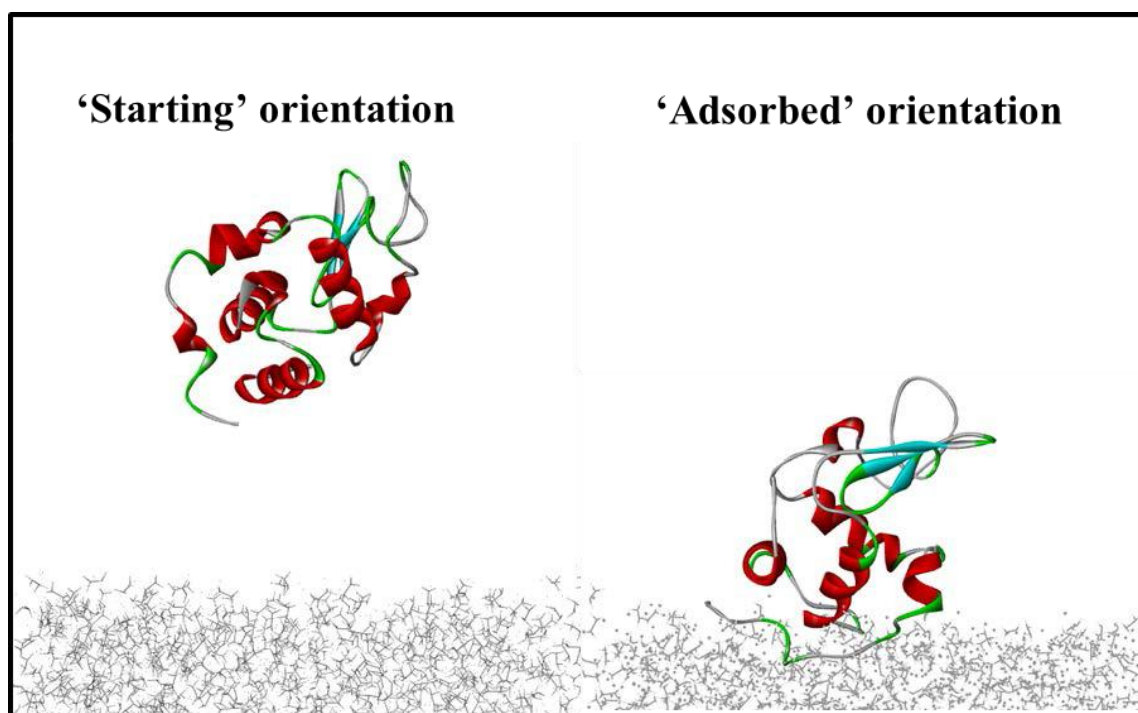

**Figure S1:** Orientation of HEWL at the start of the simulation and after adsorption at the water/DCE interface.

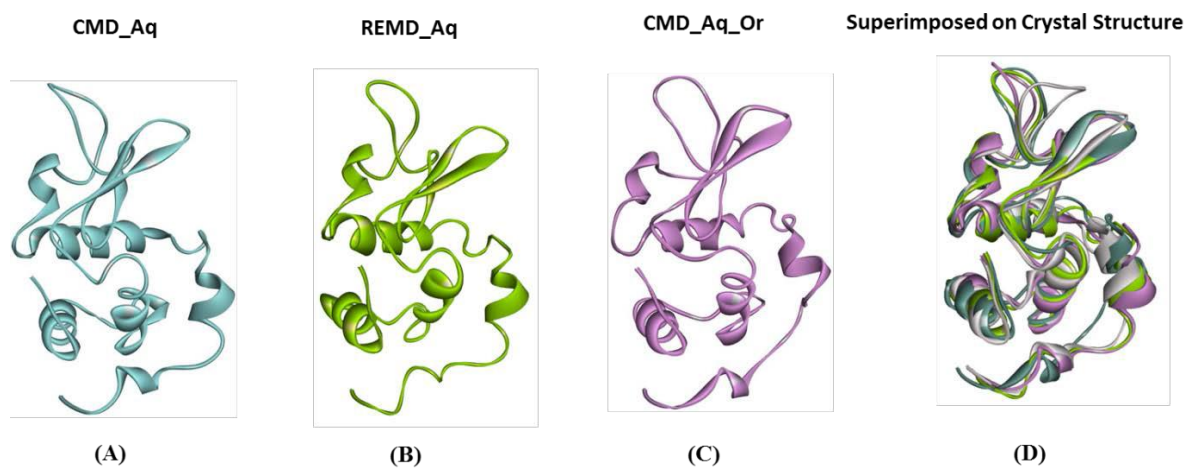

**Figure S2:** Representative structures of HEWL from cluster analysis of (A) CMD\_Aq, (B) REMD\_Aq, and (C) CMD\_Aq\_Org simulations. Superimposition of these representative structures onto the crystal structure of HEWL is shown in D.

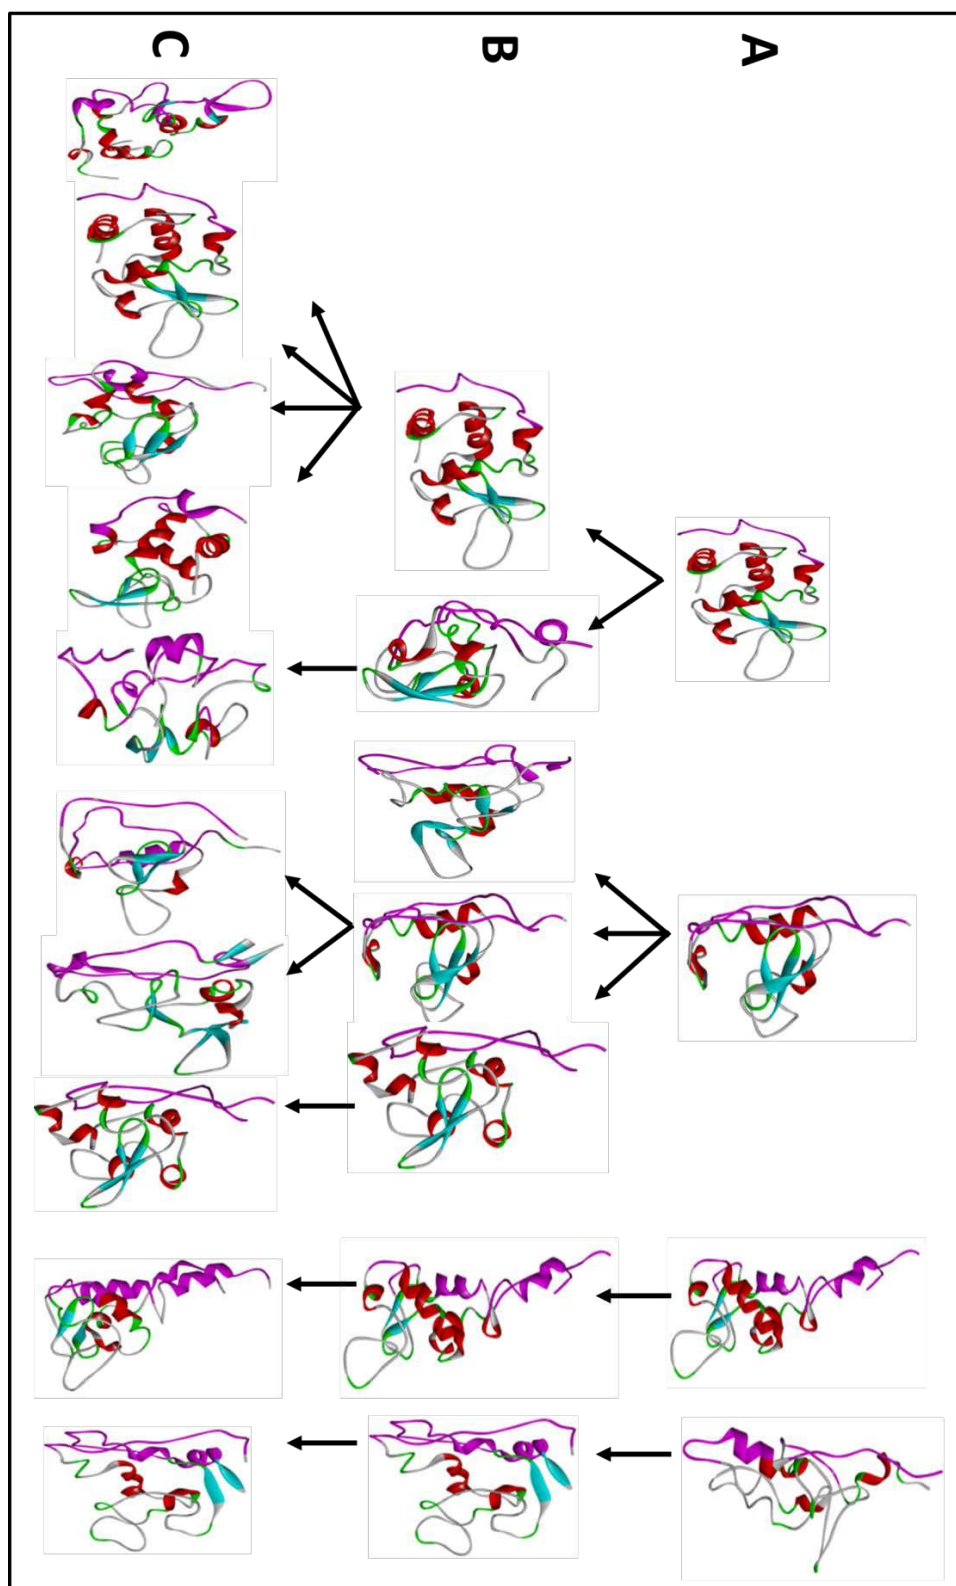

**Figure S3:** Representative structures of top clusters of HEWL adsorbed at the water/DCE interface (REMD\_Aq\_Org simulation) obtained with clustering cut-off values of 0.8 nm (**A**), 0.7 nm (**B**), and 0.6 nm (**C**).

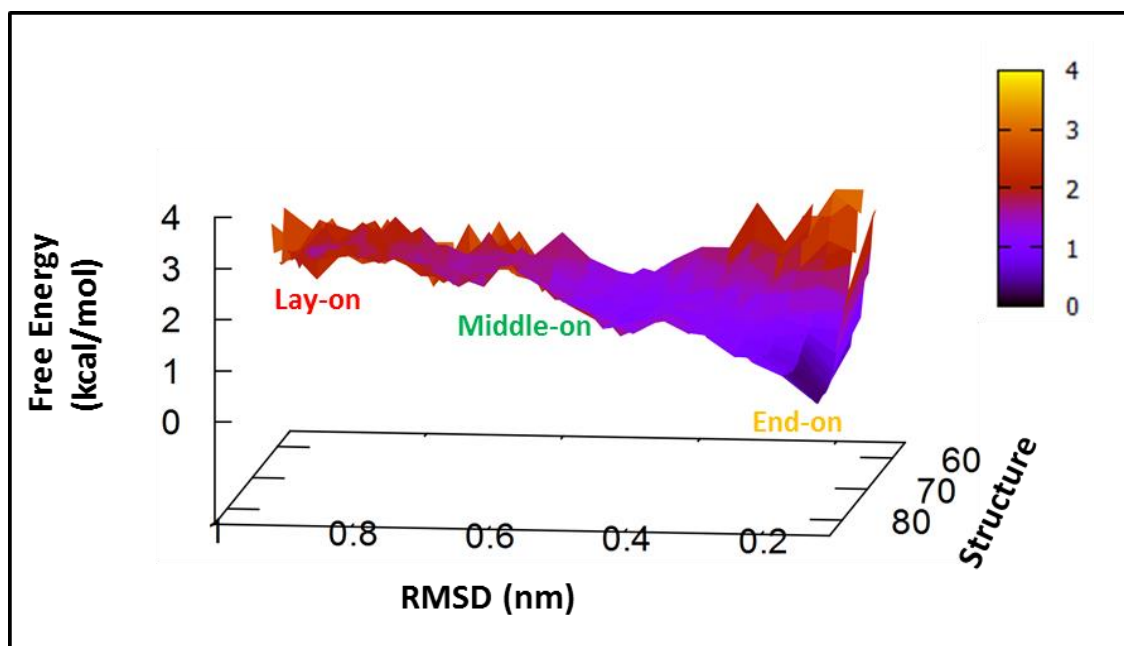

**Figure S4:** Free energy landscape for the unfolding of HEWL as a function of RMSD and secondary structure content for conformations belonging to the dominant three orientations of the protein at the water/DCE interface.
